1 **Metagenome assembled genomes of novel taxa from an acid mine drainage environment**

2

3

Christen L. Grettenberger<sup>1#</sup>, Trinity L. Hamilton<sup>2#</sup>

4

5 <sup>1</sup> Department of Earth and Planetary Sciences, University of California Davis

6 <sup>2</sup> Department of Plant and Microbial Biology and The Biotechnology Institute, University of

7 Minnesota, St. Paul, MN 55108

8

9 # For correspondence:

10

11 Christen L. Grettenberger 2119 Earth and Physical Sciences Building, University of California

12 Davis, Davis USA, 95776, Email: [clgrett@ucdavis.edu](mailto:clgrett@ucdavis.edu)

13 Trinity L Hamilton. 218 Cargill Building, Plant and Microbial Biology, University of Minnesota,

14 St. Paul, USA, 55108. Phone: +16126256372, Email: [trinityh@umn.edu](mailto:trinityh@umn.edu)

15

16

17

18 **Keywords:** AMD, metagenome assembled genome, biogeochemical cycling, bioremediation

19 **Running Title:** Metagenome assembled genomes from acid mine drainage

20

21 **ABSTRACT**

22 Acid mine drainage (AMD) is a global problem in which iron sulfide minerals oxidize and  
23 generate acidic, metal-rich water. Bioremediation relies on understanding how microbial  
24 communities inhabiting an AMD site contribute to biogeochemical cycling. A number of studies  
25 have reported community composition in AMD sites from 16S rRNA gene amplicons but it  
26 remains difficult to link taxa to function, especially in the absence of closely related cultured  
27 species or those with published genomes. Unfortunately, there is a paucity of genomes and  
28 cultured taxa from AMD environments. Here, we report 29 novel metagenome assembled  
29 genomes from Cabin Branch, an AMD site in the Daniel Boone National Forest, KY, USA. The  
30 genomes span 11 bacterial phyla and include one Archaea and include taxa that contribute to  
31 carbon, nitrogen, sulfur, and iron cycling. These data reveal overlooked taxa that contribute to  
32 carbon fixation in AMD sites as well as uncharacterized Fe(II)-oxidizing bacteria. These data  
33 provide additional context for 16S rRNA gene studies, add to our understanding of the taxa  
34 involved in biogeochemical cycling in AMD environments, and can inform bioremediation  
35 strategies.

36 **IMPORTANCE**

37 Bioremediating acid mine drainage requires understanding how microbial communities influence  
38 geochemical cycling of iron and sulfur and biologically important elements like carbon and  
39 nitrogen. Research in this area has provided an abundance of 16S rRNA gene amplicon data.  
40 However, linking these data to metabolisms is difficult because many AMD taxa are uncultured  
41 or lack published genomes. Here, we present metagenome assembled genomes from 29 novel  
42 AMD taxa and detail their metabolic potential. These data provide information on AMD taxa  
43 that could be important for bioremediation strategies including taxa that are involved in cycling  
44 iron, sulfur, carbon, and nitrogen.

45 **MAIN TEXT**

46 **1. Introduction**

47 Acid mine drainage (AMD) is a global environmental problem. Oxidative processes, both biotic  
48 and abiotic, release protons and reduced metals from sulfide minerals, resulting in highly acidic  
49 and toxic conditions that degrade environmental quality. Due to the toxicity and environmental  
50 impact of AMD, bioremediation strategies have become of interest. Research in AMD  
51 environments often seeks to understand the biogeochemical cycling occurring in the environment  
52 and aims to inform and improve the bioremediation of these sites (1–4). The geochemistry at  
53 these sites relies on the microbial communities inhabiting them. Biotic oxidation of reduced  
54 metal sulfides contributes to the formation of AMD while sulfate and iron reduction can both  
55 decrease the concentration of soluble metals and increase pH (5–11). However, the metabolic  
56 potential of many taxa in AMD environments remains uncharacterized because these taxa are not  
57 closely related to cultured taxa or those with published genomes.

58

59 AMD environments are characterized by redox gradients including contrasting concentration of  
60 oxygen and reduced metals. They can also vary in heavy metal content and pH. However, 16S  
61 rRNA gene surveys reveal that many of the same species inhabit AMD sites across the globe.  
62 For example, *Ferrovum* spp. are found in the Appalachian Coal Belt (12–14), the Iberian Pyrite  
63 Belt (15, 16), Wales (17, 18), and southeast and southwest China (19, 20). Therefore, the  
64 importance of these groups is not limited to a single site, and lack of information about their  
65 metabolisms hinders investigations of AMD environments world-wide. For example, Archaea  
66 within the order Thermoplasmatales are commonly found in AMD sites worldwide, especially  
67 those with low pH (9, 21–23). However, in many instances, 16S rRNA sequences isolated from

68 AMD are only distantly related to cultured Thermoplasmatales. Taxa in the Thermoplasmatales  
69 perform diverse metabolisms, including Fe(II) oxidation (24), obligate heterotrophy (25, 26), and  
70 sulfur respiration (27). Therefore, it is difficult to infer their metabolic potential (22). Similarly,  
71 taxa within newly discovered phyla like the Elusimicrobiota (formerly Termite Group 1) and  
72 Eremiobacteriota (formerly the WPS-2) inhabit AMD sites (28, 29), but these groups have few if  
73 any cultured taxa. Given the widespread distribution of these lineages, these taxa may play an  
74 important role in biogeochemical cycling in AMD environments, but without closely-related  
75 cultured relatives or well-annotated genomes, it is not possible to elucidate their role or potential  
76 use in bioremediation strategies.

77

78 Even in well-studied AMD groups like the Gammaproteobacteria, multiple closely related taxa  
79 may occur in AMD sites but may play different roles from their close relatives. For example,  
80 multiple *Ferrovum* taxa differ in their ability to fix nitrogen (30–33). This intragenus metabolic  
81 diversity complicates our ability to understand biogeochemical cycling in AMD environments.

82

83 Obtaining a species in pure culture has long been considered the gold standard for determining  
84 the biogeochemical role that a taxon may play in the environment. However, characterized  
85 isolates from AMD environments are rare. Culturing taxa is inherently time-consuming,  
86 especially those that require micro-oxic conditions, and can be difficult because species often  
87 require co-occurring taxa. For example, in culture, *Ferrovum* sp. co-occur with heterotrophic  
88 organisms that remove pyruvic acid and other organic material (34). Metagenomic sequencing  
89 has proven to be a valuable tool for guiding isolation of common AMD microbes through the  
90 recovery of near complete genomes. Tyson et al. used a genome-directed approach to isolate a

91 *Leptospirillum ferrooxidans* spp. capable of nitrogen fixation (35). Metagenomic approaches also  
92 provide valuable information about community structure and diversity. Thus, ‘omics-based  
93 approaches can complement pure culture studies, provide valuable insight to biogeochemical  
94 cycling in AMD environments, and inform bioremediation strategies in the absence of fully  
95 characterized isolates.

96  
97 Here, we present 29 novel, high-quality, metagenome-assembled genomes (MAGs) from Cabin  
98 Branch, an acid mine drainage site in the Daniel Boone National Forest, KY, USA. These data  
99 suggest AMD environments host previously uncharacterized Fe(II)-oxidizing bacteria and  
100 highlight the metabolic potential of a number of microbes commonly recovered in 16S rRNA-  
101 based studies of AMD. These genomes will provide additional context for gene amplicon studies  
102 in AMD environments, aid in culturing these taxa in the future, and could inform AMD  
103 bioremediation strategies.

104

## 105 **2. Methods**

### 106 ***2.1 Site location***

107 Cabin Branch is an acid mine drainage site in the Daniel Boone National Forest in Kentucky,  
108 near the border with Tennessee. Groundwater flows out from an emergence and across the  
109 limestone-lined channel before entering a pond, the Rose Pool. The microbial communities  
110 within Cabin Branch are dominated by the Fe(II)-oxidizing taxon *Ferrovum myxofaciens* (13).  
111 Methods for sample collection, DNA extraction and sequencing, and metagenome assembly and  
112 binning were described previously (33) and we include brief descriptions below.

113

## 114 **2.2 Molecular Analyses**

### 115 **2.2.1 Sample Collection, DNA Extraction, and Sequencing**

116 Triplicate samples from each site were collected for DNA extraction and were flash frozen and  
117 stored at -80 °C until processed. DNA was extracted from each replicate sample using a DNeasy  
118 PowerSoil Kit (Qiagen, Carlsbad, CA, USA) and quantified using a Qubit 3.0 Fluorometer  
119 (Invitrogen, Burlington, ON, Canada). Extractions were pooled and submitted to the University  
120 of Minnesota Genomics Center for metagenomic sequencing and sequenced using HiSeq2500  
121 High-Output 2 x 125 bp chemistry. Three samples were sequenced per lane.

122

### 123 **2.2.2. Metagenomic analysis**

124 Trimmed, quality-controlled sequences were assembled using MegaHit (36) using standard  
125 parameters except minimum contig length, which was set at 1000 base pairs. Reads were mapped  
126 to the assembly using bowtie2 (37) and depth was calculated using the  
127 `jgi_summarize_bam_contig_depths` command in Anvi'o v. 6.1 (38). Binning was performed in  
128 MetaBAT using default parameters (39) and CheckM was used to determine bin completeness  
129 (40). Bins >70% complete with <3% contamination were selected for further analysis. The  
130 average nucleotide identity (ANI) across the surviving bins was calculated using `anvi-compute-`  
131 `ani` in Anvi'o v. 6.1 which uses the PyANI algorithm to compute ANI (38, 41). Bins that shared  
132 >99% ANI across the genome were considered to be the same taxon. For each taxon, the bin  
133 with the highest completion was selected for further analysis. Bins were uploaded to KBASE and  
134 annotated using the “annotate assembly and re-annotate genomes with prokka” app (v. 1.12(42)  
135 and classified using the GTDB app (43–46).

136

137 Single copy, ribosomal protein sequences from Campbell et al., were retrieved from the MAGs  
138 and reference genomes, concatenated, and aligned in Anvi'o (47). Anvi'o uses muscle to align  
139 the concatenated sequences (48). Maximum likelihood trees were constructed using RAxML-  
140 HPC2 on XSEDE in the CIPRES Science Gateway using standard parameters: 100 bootstrap  
141 iterations, a Protein CAT model, DAYHOFF protein substitution matrix, and no correction for  
142 ascertainment bias (49, 50). Trees were visualized and rooted in the interactive tree of life (51).  
143 Newick formatted tree files are available in the supplementary information.

144

145 Relative abundance of each MAG was determined by mapping reads from each metagenome  
146 against each MAG using BBMap (52). The pileup tool within BBMap was used to summarize  
147 mapped read and the relative abundance was calculated from the total number of mapped reads  
148 divided by the total number of reads in the metagenome (53). Unmapped reads and reads  
149 mapping to more than one region were removed using SAMtools (54) prior to pileup.

150

151 Metabolic pathways for carbon, nitrogen, and sulfur cycling were predicted in each MAG using  
152 METABOLIC v. 3.0 (55).

153

154 Cyc2 genes were identified using BLAST to identify genes homologous to the Cyc2 like  
155 cytochrome c involved in Fe(II) oxidation (56–58). A BLAST database was constructed using  
156 the Cyc2 retrieved previously (57) and the search was performed using an e-value of 1E-5. To  
157 ensure that the sequences retrieved with the BLAST search were homologous to the Cyc2-like  
158 protein involved in Fe(II) oxidation, retrieved sequences and those described previously (57)  
159 were aligned in MAFFT and a maximum likelihood tree was constructed as described above.



160

161 Quality-controlled, unassembled, metagenomic data are available in the NCBI Sequence Read

162 Archive under accession numbers SRR9677580 - SRR9677585. The metagenome assembled

163 genomes used for analysis are also available on NCBI under accession numbers

164 SAMN14771053 to SAMN14771081.

165

### 166 **3. Results**

167 Cabin Branch is an AMD site in the Daniel Boone National Forest in southern Kentucky, US.

168 Groundwater at Cabin Branch emerges at pH 2.90 and flows down a limestone-lined channel

169 with a pH of 2.92 (installed as a passive remediation strategy) and enters a pool ("Rose Pool)

170 which has a pH of 2.97. Dissolved oxygen increases down the drainage site (77.5  $\mu\text{mol/L}$  at the

171 emergence, 401  $\mu\text{mol/L}$  in Rose Pool) and Fe(II) concentration ranges from 403  $\mu\text{mol/L}$  at the

172 emergence, 882.0  $\mu\text{mol/L}$  in the limestone-lined channel, and 11.16  $\mu\text{mol/L}$  in Rose Pool (33)

173

174 We recovered 256 bins from metagenomes: 38 from the emergence, 32 from the limestone-lined

175 channel, 66 from the Rose Pool, and 120 from the coassembly. Of these, 56 were >70% complete

176 with <3% contamination. These bins belonged to 32 unique taxa (Table 1). Here we present 29

177 novel, high-quality, metagenome-assembled genomes (MAGs): 4 from the emergence, 7 from

178 the limestone-lined channel, 9 from Rose Pool and 9 from the co-assembled data. The MAGs

179 ranged in relative abundance from ~4.3% to ~0.17% (Figures 1 and 2). The *Ferrovum* MAGs

180 (MAG 23 and and MAG24) were described in (33)and MAG 7 is closely related to a previously

181 described genome (59, 60).

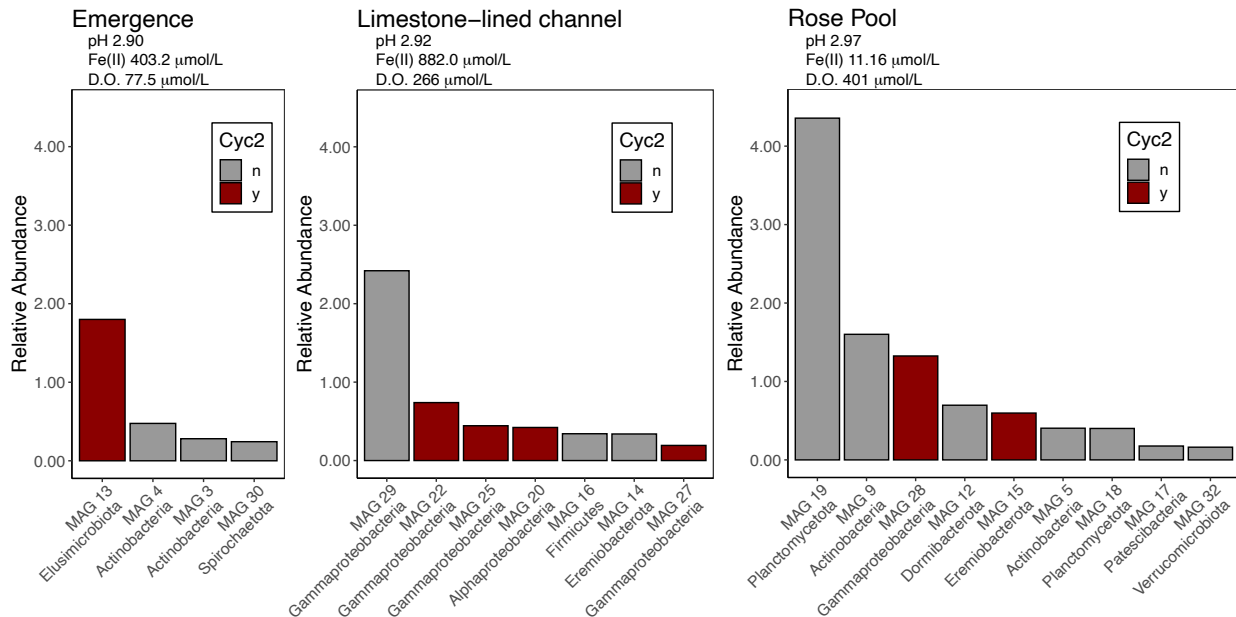

182 **Figure 1.** Rank abundance curve of the relative abundance of MAGs recovered from the  
 183 emergence, the limestone-lined channel and Rose Pool. pH, Fe(II), and D.O. were measured at  
 184 the time of sample collection and are reported in (33). Red bars indicate MAGs that encode  
 185 Cyc2. D.O., dissolved oxygen.

186

187 Below, we examine functions that are most relevant to AMD ecosystems including aerobic  
 188 respiration, carbon fixation, nitrogen cycling and biogeochemical cycling of sulfur and iron in  
 189 each MAG by phylogenetic group. For sulfur cycling, we focus on dissimilatory sulfate  
 190 reduction and sulfur oxidation by examining the presence or absence of *dsr* and *sox* genes. The  
 191 metabolic potential for ferrous iron oxidation was based on the presence of *Cyc2* like genes that  
 192 may be involved in this process (56, 57). None of the MAGs contain complete genomes and a  
 193 gene that is absent in the MAG may be present in the taxon. Therefore, these data indicate the  
 194 genes present in, not absent from, a taxon. A summary of these taxa is available in Table 1. More  
 195 complete genome descriptions and the output from METABOLIC are available in the  
 196 supplemental material.

197

### 198 3.1. Archaea

199 We recovered a single MAG classified as Archaea (MAG 1). The MAG belonged to  
200 the *Thermoplasmata* and was most closely related to *Methanomassiliicoccus* spp. (Figure 1). It  
201 did not encode genes associated with carbon fixation, N<sub>2</sub> fixation, Fe(II) oxidation or  
202 dissimilatory sulfur cycling. It appears to be capable of heterotrophic metabolisms including the  
203 degradation of some aromatics and acetogenesis. MAG 1 was recovered from the co-assembly  
204 and was most abundant in the emergence (Figure 2).

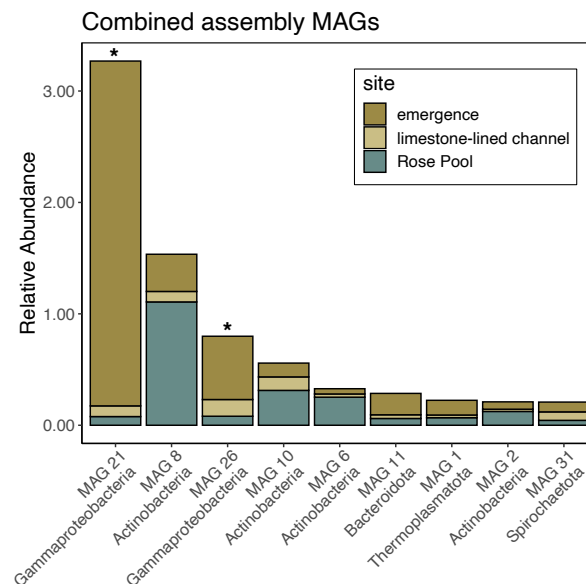

205 **Figure 2.** Rank abundance curve of the relative abundance of MAGs recovered from the co-  
206 assembled data in each site — the emergence, the limestone-lined channel and Rose Pool.  
207 Asterisks denote MAGs that encode Cyc2.  
208

### 209 3.2. Bacteria

#### 210 3.2.1. Actinobacteria

211 We retrieved nine actinobacterial MAGs, all of which belong to the order Acidimicrobiales  
212 (Figure 3). MAGs 3 – 7 belonged to the Acidimicrobiaceae, but MAGs 3-6 were unidentified  
213 below this level. MAGs 8 - 10 were affiliated with the family and genus RAAP-2 but were  
214 unidentified at the species level. Five taxa (MAGs 3 – 6, and 9) encode genes for carbon fixation.

215 Actinobacteria MAGs were recovered from the emergence and Rose Pool (Figure 1) as well as  
216 the co-assembly (Figure 2).

217

### 218 **3.2.2. Bacteroidota**

219 We retrieved a single taxon from the phylum Bacteroidota (MAG 11) from the co-assembly  
220 (Figures 2 and 3). It was affiliated with the class Bacteroidia, order AKH767, and family Palsa-  
221 948, and was unclassified below this level. The most closely related taxon was retrieved from  
222 thawing permafrost (61). It encodes the genes necessary for nitrous oxide reduction.

223

### 224 **3.2.3. Dormibacteraeota**

225 We retrieved one taxon from the phylum Dormibacteraeota (MAG 12). This taxon was affiliated  
226 with the class Dormibacteria, the order UBA8260, and the family Bog-877 and is most closely  
227 related to a taxon from thawing permafrost (61). It did not encode genes for carbon fixation, N<sub>2</sub>  
228 fixation, denitrification, dissimilatory sulfur cycling, or Fe(II) oxidation. It appears to be capable  
229 of some fermentative and C1 metabolisms (File S1)

230

### 231 **3.2.4. Elusimicrobiota**

232 We retrieved a single taxon, MAG 13, from the phylum Elusimicrobiota (formerly Termite  
233 Group 1). It was affiliated with the class Elusimicrobia, order UBA1565, family UBA9628, and  
234 genus GWA2-66-18. This taxon is most closely related to one from an aquifer system (62). It  
235 encodes the genes necessary for N<sub>2</sub> fixation and nitric oxide reduction. It also appears to encode  
236 for a Cyc2 like cytochrome that it may use for Fe(II) oxidation. MAG 13 was recovered from the  
237 emergence with a relative abundance of ~1.8%.

238

### 239 **3.2.5. Eremiobacteriota**

240 We retrieved two taxa, MAGs 14 and 15, within the phylum Eremiobacteriota (formerly the  
241 WPS-2). Both taxa were affiliated with the class Eremiobacteria, order UPB12, and family  
242 UBA5184. Neither bin contain genes for carbon fixation, N<sub>2</sub> fixation, denitrification,  
243 dissimilatory sulfur cycling, or Fe(II) oxidation. Both taxa appear to be capable of heterotrophic  
244 metabolisms including aromatics degradation and acetogenesis. MAG 14 was recovered from the  
245 limestone-lined channel while MAG 15 was present in Rose Pool (Figure 1).

246

### 247 **3.2.6. Firmicutes**

248 We retrieved a single taxon from the phylum Firmicutes (MAG 16) from the limestone-lined  
249 channel (Figure 1). This taxon was affiliated with the class Alicyclobacillia, the order  
250 Alicyclobacillales, and the family Acidibacillaceae. This taxon was most closely related to  
251 *Acidobacillus ferrooxidans*, a Fe(II) and sulfide mineral oxidizing species isolated from an AMD  
252 environments (Figure 1) (63). Unlike its closest relative, it does not encode the genes necessary  
253 for Fe(II) or sulfide mineral oxidation.

254

### 255 **3.2.7. Patescibacteria**

256 We retrieved a single taxon, MAG 17, from the phylum Patescibacteria (formerly Candidate  
257 Phylum Radiation) from Rose Pool (Figure 1). This taxon was affiliated with the class  
258 Paceibacteria, the order UBA9983\_A, the family UBA2163, and the genus C7867-001. It does  
259 not encode any of the genes of interest.

260

261 **3.2.8. Planctomycetota**

262 We recovered two taxa from the phylum Planctomycetota (MAGs 18 and 19). Both taxa were  
263 affiliated with the class Phycisphaerae. One, MAG 18, was unclassified below this level. The  
264 other, MAG 19, was affiliated with the order UBA1161. Both MAG 18 and 19 were recovered  
265 from Rose Pool where MAG 19 was more abundant (4.3% and 0.4% respectively, Figure 1).

266

267 **3.2.9. Proteobacteria**

268 We recovered ten taxa from the Proteobacteria. One, MAG 20, is a member of the  
269 Alphaproteobacteria. Nine are from the gammaproteobacterial order Burkholderiales. Two of  
270 these were described previously and were not analyzed here (33). Three encode genes for N<sub>2</sub>  
271 fixation (MAGs 20, 21, and 27), six encode genes for carbon fixation, (MAGs 20 – 22, 25, 26,  
272 28), seven encode genes for Fe(II) oxidation (MAGs 20-22 and 25-28), and three encode genes  
273 for partial sulfate reduction (MAGs 22, 25, and 26). Gammaproteobacterial MAGs were  
274 recovered from the limestone-lined channel, Rose Pool, and the co-assembly (Figure 1 and 2).  
275 MAG 21 from the co-assembly was particularly abundant at the emergence (3.3%) while MAG  
276 29 was abundant in the limestone-lined channel (2.4%).

277

278 **3.2.10. Spirochaetota**

279 We recovered two taxa from the phylum Spirochaetota (MAGs 30 and 31) from Rose Pool  
280 (Figure 1). MAG 30 was recovered from the emergence and MAG 31 was present in the co-  
281 assembly with low relative abundance across all sites (Figures 1 and 2). Both bins were members  
282 of the class Spirochaetia and the order Spirochaetales. One encodes the genes necessary for  
283 nitrate reduction to ammonia.

284 **3.2.11. Verrucomicrobiota**

285 We recovered a single taxon from the Verrucomicrobiota (MAG 32). It contains some of the

286 genes necessary for aerobic respiration and acetogenesis.

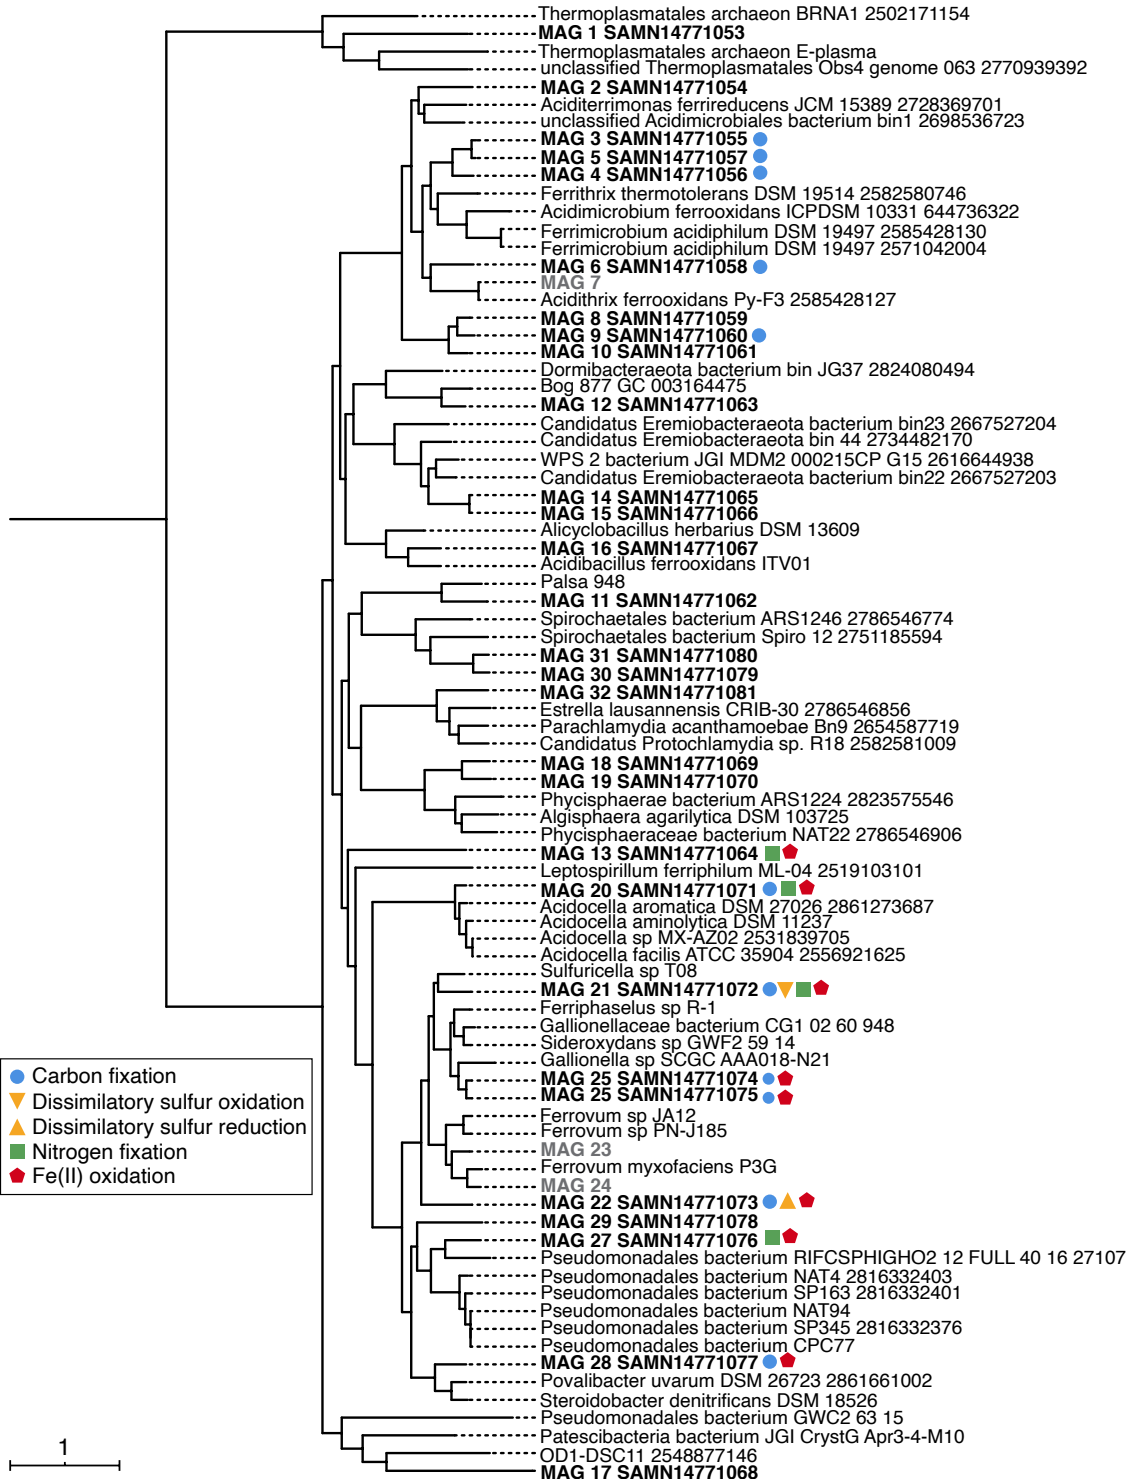

288  
289  
290  
291  
292  
293  
294

**Figure 3.** Concatenated single-copy marker gene tree constructed using genes from (47). The tree contains 83 taxa. MAGs from Cabin Branch are indicated in bold. Shapes indicated the metabolic potential of the MAGs. Carbon fixation in blue circles. Dissimilatory sulfur oxidation in yellow triangles with points up and reduction in triangles with points down, nitrogen fixation in green squares, and Fe(II) oxidation in red stars.

## 295 **4. Discussion**

### 296 **4.1 Carbon Fixation**

297 Lithotrophic carbon fixation can be a significant source of primary productivity in AMD  
298 ecosystems (64). At Cabin Branch, *Ferrovum* spp. are abundant, ranging from 5 - 33%, and  
299 likely contribute to primary productivity (33). Here, we recovered eleven MAGs that encode the  
300 genes necessary for carbon fixation. These autotrophs include those that are closely related to  
301 known lithoautotrophic organisms, including *Gallionella* (MAGs 25 and 26) and other  
302 Bulkholderiales (e.g. MAGs 20-22) as well as heterotrophs including *Acidocella* (e.g. MAG 20).  
303 This indicates that primary productivity in AMD sites may be driven, in part, by organisms that  
304 have not been considered in the past.

### 305 **4.2**

### 306 **Sulfur Cycling**

307 Sulfur cycling is an important process in AMD ecosystems. Bioremediation may rely on  
308 dissimilatory sulfate reduction, especially in constructed wetlands (4). Dissimilatory sulfate  
309 reduction combats AMD by generating alkalinity, can lead to the formation of ferrous sulfide  
310 minerals in sediments, and decreases the concentration of soluble metals (5–11). Conversely,  
311 biological sulfur oxidation generates AMD by oxidizing sulfur in iron sulfide minerals. MAG 21  
312 encodes homologs of *dsrA*, *dsrB*, and *aprA*, indicating that it may be capable of dissimilatory



313 sulfate reduction, at least from APS to sulfide. Therefore, this taxon may play an important role  
314 in constructed wetland bioremediation.

315

316 AMD occurs naturally when weathering processes expose sulfide mineral-bearing rocks to  
317 oxygen-rich water. The result is the oxidation of these sulfide minerals which produces sulfuric  
318 acid (H<sub>2</sub>SO<sub>4</sub>) and dissolved metals. Iron-sulfide minerals like pyrite can also be oxidized by  
319 biological sulfur oxidation (65, 66). The oxidation of iron sulfide minerals may occur either at a  
320 pyrite vein or in freshly deposited sediments that are exposed to oxygen. We recovered a single  
321 MAG, MAG 22, that contains the genes necessary for sulfur oxidation from thiosulfate to  
322 sulfate. This taxon is unlikely to cause the oxidation of sulfide-bearing minerals but may play a  
323 role in aqueous sulfur cycling in the environment.

324

### 325 **4.3 Nitrogen Cycling**

326 Common Fe(II) oxidizing organisms in AMD environments such as *Ferroplasma myxofaciens* are  
327 capable of nitrogen fixation (30–33, 67) and may provide fixed nitrogen to AMD communities.  
328 Four of the MAGs recovered here (MAGS 13, 20, 21, and 27) contain the genes necessary for  
329 nitrogen fixation. These organisms may serve as a source of bioavailable nitrogen in AMD  
330 ecosystems and, in so doing, increase the productivity of their communities.

331

### 332 **4.4. Fe(II) Oxidation**

333 Fe(II) oxidation is a key process in AMD environments for bioremediation and as a source of  
334 energy to drive primary productivity. Indeed, our previous analyses recovered multiple abundant  
335 *Ferroplasma* MAGs whose genomes are consistent with carbon fixation coupled to Fe oxidation

336 (33). Here we identified 9 MAGs that encoded homologs of the Cyc2 protein involved in Fe(II)  
337 oxidation (57). These MAGs were recovered across sample sites that range in dissolved oxygen  
338 and Fe(II) concentration and are present at relative abundances that suggest key roles in  
339 community function (Figures 1 and 2). Seven of the MAGs that encode Cyc2 belong to  
340 proteobacterial lineages with other known Fe oxidizers. Additionally, MAGs within the recently  
341 discovered phyla Elusimicrobia (MAG 13) and Eremiobacterota (MAG 15) encode Cyc2. These  
342 taxa have not previously been recognized as Fe(II) oxidizers but the recovery of Cyc2 in these  
343 MAGs further expands our knowledge of the taxonomic diversity of Fe(II) oxidation.

344

#### 345 **4.5 Phylogenetic Relatedness and Metabolism**

346 In the absence of characterized isolates, we often rely on phylogenetic relationships between taxa  
347 found at AMD sites and their closest cultured relatives to infer their role in biogeochemical  
348 cycling (13, 22, 68, 69). This approach leverages the use of 16S rRNA gene amplicon data,  
349 which is relatively inexpensive in terms of time and cost, at the expense of the metabolic insights  
350 inferred from expensive and time-consuming ‘omics approaches or validated by culture-based  
351 approaches. This approach—inferring physiology from 16 rRNA gene sequences—can be  
352 informative for major metabolic pathways when taxa are closely related to their nearest cultured  
353 relative. For example, like *Gallionella ferruginea*, the metabolic potential of the  
354 *Gallionella* MAGs (MAGs 25 and 26) recovered here is consistent with chemolithoautotrophy  
355 fueled by Fe(II) oxidation. These relationships are less robust with increasing phylogenetic  
356 distance.

357

358 Inferring metabolism from 16S rRNA gene sequences becomes more difficult as the number of  
359 available genomes from similar environments decreases. For example, AMD environments often  
360 host organisms within the Archaeal order Thermoplasmatales (9, 22, 23). However, there is a  
361 paucity of Thermoplasmatales genomes available from AMD environments. This order also  
362 contains taxa with diverse metabolisms, including Fe(II) oxidation (24), obligate heterotrophy  
363 (25, 26), and sulfur respiration (27). The lack of genomes and culture representatives from AMD  
364 environments coupled to the physiological diversity of Thermoplasmatales makes it difficult to  
365 interpret the role of these archaea in AMD environments. The Thermoplasmatales MAG presented  
366 here appears to be a heterotroph capable of aerobic respiration.

367

368 The role of taxa affiliated with uncultivated or recently discovered phyla in biogeochemical  
369 cycling in AMD is particularly difficult to predict. Here, we presented MAGs from four such  
370 phyla — the Dormibacterota, the Elusimicrobiota, the Eremiobacterota, and the Patescibacteria.  
371 Dormibacterota and Patescibacteria are not widely reported in AMD. Eremiobacterota inhabit  
372 multiple mining-impacted sites including stalactites in a mining cave (70), neutral mine drainage  
373 in Brazil (71), and AMD in the eastern United States (28). Abundances of the Eremiobacterota  
374 correlated with total organic carbon in an AMD site in China (68) and were recovered from Rose  
375 Pool where dissolved organic carbon is present (36.8 d from the emergence where dissolved  
376 oxygen is present, albeit well below saturation (77.5  $\mu\text{mol/L}$ , (33). One of the Eremiobacterota  
377 MAGs (MAG 15) One of the MAGs at Cabin Branch encodes a Cyc-2 like protein that may be  
378 involved in Fe(II) oxidation. Therefore, this taxon may play an important and underappreciated  
379 role in Fe cycling in AMD environments.

380

381 Elusimicrobiota have also been found in AMD environments across the globe including in Spain  
382 (70, 72), France (29), and Svalbard (73), but it is not abundant in these environments. The only  
383 cultivated taxa from this phylum are strictly anaerobic (74–76). The Elusimicrobiota MAG from  
384 Cabin Branch encodes genes for three terminal oxidases and likely employs aerobic respiration.  
385 The Elusimicrobiota MAG (MAG 13) was abundant in the emergence where dissolved oxygen is  
386 present, albeit below saturation (77.5  $\mu\text{mol/L}$ ). The MAG also contains the genes necessary for  
387 nitrogen fixation and may encode a Cyc2-like protein that it may use for Fe(II) oxidation.  
388 Therefore, it likely plays an important role in nitrogen cycling in AMD environments and may  
389 also contribute to iron cycling.

390

391 A combination of ‘omics-based approaches and cultivation can increase our ability to correlate  
392 function with taxonomy from 16S rRNA amplicon studies. Here we present high quality MAGs  
393 from AMD sites to increase current understanding of community composition and function.  
394 These data reveal previously unrecognized taxa that contribute to carbon, nitrogen, and Fe(II)  
395 cycling in AMD. In particular, these data underscore roles for previously uncharacterized  
396 Gammaproteobacteria in Fe(II) oxidation in addition to uncultivated or recently discovered  
397 phyla, the prevalence of Actinobacteria across AMD sites that range in oxygen and Fe(II)  
398 concentration, and taxa with high relative abundance whose function remains unclear. These data  
399 provide a framework to assist in culturing taxa of interest as well as additional target organisms  
400 for AMD bioremediation strategies.

#### 401 **ACKNOWLEDGEMENTS**

402 We are grateful to the staff of the National Forest Service and Daniel Boone National Forest,  
403 especially Margueritte Wilson and Claudia Cotton, for the advice and insight regarding mine

404 locations. We thank A. Gangidine, M. Berberich, R. Jain, and C. Schuler for assistance in field  
405 sampling and processing samples in the laboratory. The authors acknowledge the Minnesota  
406 Supercomputing Institute (MSI) at the University of Minnesota for providing resources that  
407 contributed to the research results reported within this paper.

408

#### 409 **AUTHOR CONTRIBUTIONS**

410 C.L.G and T.L.H designed the study, completed the analyses and wrote the paper.

411

#### 412 **COMPETING FINANCIAL INTERESTS**

413 The authors declare no competing financial interests.

414

#### 415 **MATERIALS & CORRESPONDENCE**

416 Correspondence and requests for materials should be addressed to T.L.H.: Trinity L. Hamilton.

417 Department of Plant and Microbial Biology, University of Minnesota, St. Paul, USA, 55108.

418 Phone: +16126256372, Email: [trinityh@umn.edu](mailto:trinityh@umn.edu).

419 **FIGURE AND TABLE LEGENDS**

420 **Figure 1.** Rank abundance curve of the relative abundance of MAGs recovered from the  
421 emergence, the limestone-lined channel and Rose Pool. pH, Fe(II), and D.O. were measured at  
422 the time of sample collection and are reported in (33). Red bars indicate MAGs that encode  
423 Cyc2. D.O., dissolved oxygen.

424

425 **Figure 2.** Rank abundance curve of the relative abundance of MAGs recovered from the co-  
426 assembled data in each site — the emergence, the limestone-lined channel and Rose Pool.  
427 Asterisks denote MAGs that encode Cyc2.

428

429 **Figure 3.** Concatenated single-copy marker gene tree constructed using genes from (47). The  
430 tree contains 83 taxa. MAGs from Cabin Branch are indicated in bold. Shapes indicated the  
431 metabolic potential of the MAGs. Carbon fixation in blue circles. Dissimilatory sulfur oxidation  
432 in yellow triangles with points up and reduction in triangles with points down, nitrogen fixation  
433 in green squares, and Fe(II) oxidation in red stars.

434

435 **Table 1.** Summary of the MAGs presented here. Taxa indicated by grey text were not analyzed  
436 in this work because they were either closely related to cultured taxa (e.g. MAG 7) or were  
437 presented previously (MAGs 24 and 24; 33).

438

439

440

441

442 **SUPPLEMENTAL RESULTS.**

443 Descriptions of each MAG retrieved from the Cabin Branch AMD site.

444

445 **SUPPLEMENTAL FILES.**

446 **File S1.** Output from METABOLIC showing presence or absence of the genes necessary for  
447 metabolic pathways for each MAG.

448 **File S2.** Newick-formatted, maximum likelihood tree of concatenated ribosomal proteins for all  
449 MAGs.

450 **File S3.** Newick-formatted, maximum likelihood tree of Cyc2-like proteins retrieved from Cabin  
451 Branch MAGs and reference sequences.

452 **REFERENCE CITED**

453

- 454 1. Gupta A, Dutta A, Sarkar J, Panigrahi MK, Sar P. 2018. Low-Abundance Members of the  
455 Firmicutes Facilitate Bioremediation of Soil Impacted by Highly Acidic Mine Drainage From the  
456 Malanjkhand Copper Project, India. *Front Microbiol* 9:2882.
- 457 2. Johnson DB, Hallberg KB. 2005. Biogeochemistry of the compost bioreactor components of a  
458 composite acid mine drainage passive remediation system. *Sci Total Environ* 338:81–93.
- 459 3. Neculita C-M, Zagury GJ, Bussière B. 2007. Passive Treatment of Acid Mine Drainage in  
460 Bioreactors using Sulfate-Reducing Bacteria. *J Environ Qual* 36:1–16.
- 461 4. Sánchez-Andrea I, Sanz JL, Bijmans MFM, Stams AJM. 2013. Sulfate reduction at low pH to  
462 remediate acid mine drainage. *J Hazard Mater* 269:98–109.
- 463 5. Baker BJ, Banfield JF. 2003. Microbial communities in acid mine drainage. *Fems Microbiol*  
464 *Ecol* 44:139–152.
- 465 6. Bijmans MFM, Vries E de, Yang C-H, Buisman CJN, Lens PNL, Dopson M. 2010. Sulfate  
466 reduction at pH 4.0 for treatment of process and wastewaters. *Biotechnol Progr* 26:1029–37.
- 467 7. Bijmans MFM, Helvoort P-J van, Dar SA, Dopson M, Lens PNL, Buisman CJN. 2009.  
468 Selective recovery of nickel over iron from a nickel–iron solution using microbial sulfate  
469 reduction in a gas-lift bioreactor. *Water Res* 43:853–861.
- 470 8. Church CD, Wilkin RT, Alpers CN, Rye RO, McCleskey RB. 2007. Microbial sulfate  
471 reduction and metal attenuation in pH 4 acid mine water. *Geochem T* 8:10.
- 472 9. Druschel GK, Baker BJ, Gihring TM, Banfield JF. 2004. Acid mine drainage biogeochemistry  
473 at Iron Mountain, California. *Geochem T* 5:13.
- 474 10. Giloteaux L, Duran R, Casiot C, Bruneel O, Elbaz-Poulichet F, Goñi-Urriza M. 2012. Three-  
475 year survey of sulfate-reducing bacteria community structure in Carnoulès acid mine drainage  
476 (France), highly contaminated by arsenic. *Fems Microbiol Ecol* 83:724–737.
- 477 11. Kaksonen AH, Franzmann PD, Puhakka JA. 2004. Effects of hydraulic retention time and  
478 sulfide toxicity on ethanol and acetate oxidation in sulfate-reducing metal-precipitating fluidized-  
479 bed reactor. *Biotechnol Bioeng* 86:332–343.
- 480 12. Grettenberger CL, Pearce AR, Bibby KJ, Jones DS, Burgos WD, Macalady JL. 2017.  
481 Efficient Low-pH Iron Removal by a Microbial Iron Oxide Mound Ecosystem at Scalp Level  
482 Run. *Appl Environ Microb* 83:e00015-17.
- 483 13. Havig JR, Grettenberger C, Hamilton TL. 2017. Geochemistry and microbial community  
484 composition across a range of acid mine drainage impact and implications for the Neoproterozoic  
485 Paleoproterozoic transition. *J Geophys Res Biogeosciences* 122:1404–1422.
- 486 14. Jones DS, Kohl C, Grettenberger C, Larson LN, Burgos WD, Macalady JL. 2015.  
487 Geochemical Niches of Iron-Oxidizing Acidophiles in Acidic Coal Mine Drainage. *Appl*  
488 *Environ Microb* 81:1242–1250.
- 489 15. González-Toril E, Santofimia E, López-Pamo E, Omoregie EO, Amils R, Aguilera Á. 2013.  
490 Microbial Ecology in Extreme Acidic Pit Lakes from the Iberian Pyrite Belt (SW Spain). *Adv*  
491 *Mat Res* 825:23–27.



- 492 16. Santofimia E, González-Toril E, López-Pamo E, Gomariz M, Amils R, Aguilera A. 2013.  
493 Microbial Diversity and Its Relationship to Physicochemical Characteristics of the Water in Two  
494 Extreme Acidic Pit Lakes from the Iberian Pyrite Belt (SW Spain). *Plos One* 8:e66746.
- 495 17. Hallberg KB, Coupland K, Kimura S, Johnson DB. 2006. Macroscopic Streamer Growths in  
496 Acidic, Metal-Rich Mine Waters in North Wales Consist of Novel and Remarkably Simple  
497 Bacterial Communities. *Appl Environ Microb* 72:2022–2030.
- 498 18. Kay C, Rowe O, Rocchetti L, Coupland K, Hallberg K, Johnson D. 2013. Evolution of  
499 Microbial “Streamer” Growths in an Acidic, Metal-Contaminated Stream Draining an  
500 Abandoned Underground Copper Mine. *Life* 3:189–210.
- 501 19. Kuang J-L, Huang L-N, Chen L-X, Hua Z-S, Li S-J, Hu M, Li J-T, Shu W-S. 2013.  
502 Contemporary environmental variation determines microbial diversity patterns in acid mine  
503 drainage. *Isme J* 7:1038.
- 504 20. Sun W, Xiao T, Sun M, Dong Y, Ning Z, Xiao E, Tang S, Li J. 2015. Diversity of the  
505 Sediment Microbial Community in the Aha Watershed (Southwest China) in Response to Acid  
506 Mine Drainage Pollution Gradients. *Appl Environ Microb* 81:4874–84.
- 507 21. González-Toril E, Aguilera A, Souza-Egipsy V, Ercilla MD, López-Pamo E, Sánchez-  
508 España FJ, Amils R. 2009. Comparison between Acid Mine Effluents, La Zarza-Perrunal and  
509 Río Tinto (Iberian Pyritic Belt). *Adv Mat Res* 71–73:113–116.
- 510 22. Grettenberger CL, Rench RLM, Gruen DS, Mills DB, Carney C, Brainard J, Hamasaki H,  
511 Ramirez R, Watanabe Y, Amaral-Zettler LA, Ohmoto H, Macalady JL. 2020. Microbial  
512 population structure in a stratified, acidic pit lake in the Iberian Pyrite Belt. *Geomicrobiol J* 1–12.
- 513 23. Qiu G, Wan M, Qian L, Huang Z, Liu K, Liu X, Shi W, Yang Y. 2008. Archaeal diversity in  
514 acid mine drainage from Dabaoshan Mine, China. *J Basic Microb* 48:401–409.
- 515 24. Golyshina OV, Pivovarova TA, Karavaiko GI, Kondratéva TF, Moore ER, Abraham WR,  
516 Lünsdorf H, Timmis KN, Yakimov MM, Golyshin PN. 2000. *Ferroplasma acidiphilum* gen.  
517 nov., sp. nov., an acidophilic, autotrophic, ferrous-iron-oxidizing, cell-wall-lacking, mesophilic  
518 member of the *Ferroplasmaceae* fam. nov., comprising a distinct lineage of the Archaea. *Int J*  
519 *Syst Evol Micr* 50:997–1006.
- 520 25. Golyshina OV, Lünsdorf H, Kublanov IV, Goldenstein NI, Hinrichs K-U, Golyshin PN.  
521 2015. The novel extremely acidophilic, cell-wall-deficient archaeon *Cuniculiplasma divulgatum*  
522 gen. nov., sp. nov. represents a new family, *Cuniculiplasmataceae* fam. nov., of the order  
523 *Thermoplasmatales*. *Int J Syst Evol Micr* 66:332–40.
- 524 26. Itoh T, Yoshikawa N, Takashina T. 2007. *Thermogymnomonas acidicola* gen. nov., sp. nov.,  
525 a novel thermoacidophilic, cell wall-less archaeon in the order *Thermoplasmatales*, isolated from  
526 a solfataric soil in Hakone, Japan. *Int J Syst Evol Micr* 57:2557–2561.
- 527 27. Segerer A, Langworthy TA, Stetter KO. 1988. *Thermoplasma acidophilum* and  
528 *Thermoplasma volcanium* sp. nov. from Solfatara Fields. *Syst Appl Microbiol* 10:161–171.
- 529 28. Brantner JS, Haake ZJ, Burwick JE, Menge CM, Hotchkiss ST, Senko JM. 2014. Depth-  
530 dependent geochemical and microbiological gradients in Fe(III) deposits resulting from coal  
531 mine-derived acid mine drainage. *Front Microbiol* 5:215.
- 532 29. Volant A, Bruneel O, Desoeuvre A, Héry M, Casiot C, Bru N, Delpoux S, Fahy A, Javerliat  
533 F, Bouchez O, Duran R, Bertin PN, Elbaz-Poulichet F, Lauga B. 2014. Diversity and

- 534 spatiotemporal dynamics of bacterial communities: physicochemical and other drivers along an  
535 acid mine drainage. *Fems Microbiol Ecol* 90:247–263.
- 536 30. Ullrich SR, Poehlein A, Daniel R, Tischler JS, Vogel S, Schlömann M, Mühling M. 2015.  
537 Comparative Genomics Underlines the Functional and Taxonomic Diversity of Novel  
538 “*Ferrovum*” Related Iron Oxidizing Bacteria. *Adv Mat Res* 1130:15–18.
- 539 31. Ullrich SR, González C, Poehlein A, Tischler JS, Daniel R, Schlömann M, Holmes DS,  
540 Mühling M. 2016. Gene Loss and Horizontal Gene Transfer Contributed to the Genome  
541 Evolution of the Extreme Acidophile “*Ferrovum*.” *Front Microbiol* 7:797.
- 542 32. Ullrich SR, Poehlein A, Tischler JS, González C, Ossandon FJ, Daniel R, Holmes DS,  
543 Schlömann M, Mühling M. 2016. Genome Analysis of the Biotechnologically Relevant  
544 Acidophilic Iron Oxidising Strain JA12 Indicates Phylogenetic and Metabolic Diversity within  
545 the Novel Genus “*Ferrovum*.” *Plos One* 11:e0146832.
- 546 33. Grettenberger CL, Havig J, Hamilton T. n.d. Metabolic diversity and co-occurrence of  
547 multiple *Ferrovum* species at an acid mine drainage site.
- 548 34. Johnson DB, Hallberg KB, Hedrich S. 2014. Uncovering a Microbial Enigma: Isolation and  
549 Characterization of the Streamer-Generating, Iron-Oxidizing, Acidophilic Bacterium “*Ferrovum*  
550 *myxofaciens*.” *Appl Environ Microb* 80:672–680.
- 551 35. Tyson GW, Lo I, Baker BJ, Allen EE, Hugenholtz P, Banfield JF. 2005. Genome-Directed  
552 Isolation of the Key Nitrogen Fixer *Leptospirillum ferrodiazotrophum* sp. nov. from an  
553 Acidophilic Microbial Community. *Appl Environ Microb* 71:6319–6324.
- 554 36. Li D, Liu C-M, Luo R, Sadakane K, Lam T-W. 2015. MEGAHIT: an ultra-fast single-node  
555 solution for large and complex metagenomics assembly via succinct de Bruijn graph.  
556 *Bioinformatics* 31:1674–1676.
- 557 37. Langmead B, Salzberg SL. 2012. Fast gapped-read alignment with Bowtie 2. *Nat Methods*  
558 9:357.
- 559 38. Eren AM, Esen ÖC, Quince C, Vineis JH, Morrison HG, Sogin ML, Delmont TO. 2015.  
560 Anvi’o: an advanced analysis and visualization platform for ‘omics data. *Peerj* 3:e1319.
- 561 39. Kang DD, Froula J, Egan R, Wang Z. 2015. MetaBAT, an efficient tool for accurately  
562 reconstructing single genomes from complex microbial communities. *Peerj* 3:e1165.
- 563 40. Parks DH, Imelfort M, Skennerton CT, Hugenholtz P, Tyson GW. 2015. CheckM: assessing  
564 the quality of microbial genomes recovered from isolates, single cells, and metagenomes.  
565 *Genome Res* 25:1043–1055.
- 566 41. Pritchard L, Glover RH, Humphris S, Elphinstone JG, Toth IK. 2016. Genomics and  
567 taxonomy in diagnostics for food security: soft-rotting enterobacterial plant pathogens. *Anal*  
568 *Methods-uk* 8:12–24.
- 569 42. Seemann T. 2014. Prokka: rapid prokaryotic genome annotation. *Bioinformatics* 30:2068–  
570 2069.
- 571 43. Arkin AP, Cottingham RW, Henry CS, Harris NL, Stevens RL, Maslov S, Dehal P, Ware D,  
572 Perez F, Canon S, Sneddon MW, Henderson ML, Riehl WJ, Murphy-Olson D, Chan SY,  
573 Kamimura RT, Kumari S, Drake MM, Brettin TS, Glass EM, Chivian D, Gunter D, Weston DJ,  
574 Allen BH, Baumohl J, Best AA, Bowen B, Brenner SE, Bun CC, Chandonia J-M, Chia J-M,

- 575 Colasanti R, Conrad N, Davis JJ, Davison BH, DeJongh M, Devoid S, Dietrich E, Dubchak I,  
576 Edirisinghe JN, Fang G, Faria JP, Frybarger PM, Gerlach W, Gerstein M, Greiner A, Gurtowski  
577 J, Haun HL, He F, Jain R, Joachimiak MP, Keegan KP, Kondo S, Kumar V, Land ML, Meyer F,  
578 Mills M, Novichkov PS, Oh T, Olsen GJ, Olson R, Parrello B, Pasternak S, Pearson E, Poon SS,  
579 Price GA, Ramakrishnan S, Ranjan P, Ronald PC, Schatz MC, Seaver SMD, Shukla M,  
580 Sutormin RA, Syed MH, Thomason J, Tintle NL, Wang D, Xia F, Yoo H, Yoo S, Yu D. 2018.  
581 KBase: The United States Department of Energy Systems Biology Knowledgebase. *Nat*  
582 *Biotechnol* 36:566.
- 583 44. Allen B, Drake M, Harris N, Sullivan T. 2017. Using KBase to Assemble and Annotate  
584 Prokaryotic Genomes. *Curr Protoc Microbiol* 46:1E.13.1-1E.13.18.
- 585 45. Parks DH, Chuvochina M, Waite DW, Rinke C, Skarszewski A, Chaumeil P-A, Hugenholtz  
586 P. 2018. A standardized bacterial taxonomy based on genome phylogeny substantially revises the  
587 tree of life. *Nat Biotechnol* 36:996–1004.
- 588 46. Chaumeil P-A, Mussig AJ, Hugenholtz P, Parks DH. 2019. GTDB-Tk: a toolkit to classify  
589 genomes with the Genome Taxonomy Database. *Bioinform Oxf Engl*.
- 590 47. Campbell BJ, Yu L, Heidelberg JF, Kirchman DL. 2011. Activity of abundant and rare  
591 bacteria in a coastal ocean. *Proc National Acad Sci* 108:12776–12781.
- 592 48. Edgar RC. 2004. MUSCLE: multiple sequence alignment with high accuracy and high  
593 throughput. *Nucleic Acids Res* 32:1792–1797.
- 594 49. Miller MA, Pfeiffer W, Schwartz T. 2010. Creating the CIPRES Science Gateway for  
595 Inference of Large Phylogenetic Trees. 2010 Gatew Comput Environ Work Gce 1–8.
- 596 50. Stamatakis A. 2006. RAXML-VI-HPC: maximum likelihood-based phylogenetic analyses  
597 with thousands of taxa and mixed models. *Bioinformatics* 22:2688–2690.
- 598 51. Letunic I, Bork P. 2016. Interactive tree of life (iTOL) v3: an online tool for the display and  
599 annotation of phylogenetic and other trees. *Nucleic Acids Res* 44:W242–W245.
- 600 52. Bushnell B. 2014. BBMap: A fast, accurate, splice-aware aligner.
- 601 53. Hua Z-S, Wang Y-L, Evans PN, Qu Y-N, Goh KM, Rao Y-Z, Qi Y-L, Li Y-X, Huang M-J,  
602 Jiao J-Y, Chen Y-T, Mao Y-P, Shu W-S, Hozzein W, Hedlund BP, Tyson GW, Zhang T, Li W-J.  
603 2019. Insights into the ecological roles and evolution of methyl-coenzyme M reductase-  
604 containing hot spring Archaea. *Nat Commun* 10:4574.
- 605 54. Li H, Handsaker B, Wysoker A, Fennell T, Ruan J, Homer N, Marth G, Abecasis G, Durbin  
606 R, Subgroup 1000 Genome Project Data Processing. 2009. The Sequence Alignment/Map format  
607 and SAMtools. *Bioinform Oxf Engl* 25:2078–9.
- 608 55. Zhou Z, Tran P, Liu Y, Kieft K, Anantharaman K. 2019. METABOLIC: A scalable high-  
609 throughput metabolic and biogeochemical functional trait profiler based on microbial genomes.  
610 *Biorxiv* 761643.
- 611 56. Chan C, McAllister SM, Garber A, Hallahan BJ, Rozovsky S. 2018. Fe oxidation by a fused  
612 cytochrome-porin common to diverse Fe-oxidizing bacteria. *Biorxiv* 228056.
- 613 57. McAllister SM, Polson SW, Butterfield DA, Glazer BT, Sylvan JB, Chan CS. 2020.  
614 Validating the Cyc2 Neutrophilic Iron Oxidation Pathway Using Meta-omics of  
615 Zetaproteobacteria Iron Mats at Marine Hydrothermal Vents. *Msystems* 5.

- 616 58. Altschul SF, Gish W, Miller W, Myers EW, Lipman DJ. 1990. Basic local alignment search  
617 tool. *J Mol Biol* 215:403–410.
- 618 59. Jones RM, Johnson DB. 2015. *Acidithrix ferrooxidans* gen. nov., sp. nov.; a filamentous and  
619 obligately heterotrophic, acidophilic member of the Actinobacteria that catalyzes dissimilatory  
620 oxido-reduction of iron. *Res Microbiol* 166:111–120.
- 621 60. Eisen S, Poehlein A, Johnson DB, Daniel R, Schlömann M, Mühling M. 2015. Genome  
622 Sequence of the Acidophilic Ferrous Iron-Oxidizing Isolate *Acidithrix ferrooxidans* Strain Py-  
623 F3, the Proposed Type Strain of the Novel Actinobacterial Genus *Acidithrix*. *Genome Announc*  
624 3:e00382-15.
- 625 61. Woodcroft BJ, Singleton CM, Boyd JA, Evans PN, Emerson JB, Zayed AAF, Hoelzle RD,  
626 Lambertson TO, McCalley CK, Hodgkins SB, Wilson RM, Purvine SO, Nicora CD, Li C,  
627 Froelking S, Chanton JP, Crill PM, Saleska SR, Rich VI, Tyson GW. 2018. Genome-centric view  
628 of carbon processing in thawing permafrost. *Nature* 560:49–54.
- 629 62. Anantharaman K, Brown CT, Hug LA, Sharon I, Castelle CJ, Probst AJ, Thomas BC, Singh  
630 A, Wilkins MJ, Karaoz U, Brodie EL, Williams KH, Hubbard SS, Banfield JF. 2016. Thousands  
631 of microbial genomes shed light on interconnected biogeochemical processes in an aquifer  
632 system. *Nat Commun* 7:13219.
- 633 63. Dall’Agnol H, Nancucio I, Johnson DB, Oliveira R, Leite L, Pylro VS, Holanda R, Grail B,  
634 Carvalho N, Nunes GL, Tzotzos G, Fernandes GR, Dutra J, Orellana SC, Oliveira G. 2016. Draft  
635 Genome Sequence of “*Acidibacillus ferrooxidans*” ITV01, a Novel Acidophilic Firmicute  
636 Isolated from a Chalcopyrite Mine Drainage Site in Brazil. *Genome Announc* 4:e01748-15.
- 637 64. Havig JR, Hamilton TL. 2019. Productivity and Community Composition of Low  
638 Biomass/High Silica Precipitation Hot Springs: A Possible Window to Earth’s Early Biosphere?  
639 *Life Basel Switz* 9:64.
- 640 65. Nordstrom DK, Southam G. 1997. Geomicrobiology of sulfide mineral oxidation, p. 361–  
641 390. *In* Banfield, JF and Nealson, KH eds., *Geomicrobiology: Interactions between microbes and*  
642 *minerals*, vol 35, *Reviews in Mineralogy*, Min Soc Am, Washington DC.
- 643 66. Evangelou VP (Bill), Zhang YL. 1995. A review: Pyrite oxidation mechanisms and acid  
644 mine drainage prevention. *Crit Rev Env Sci Tec* 25:141–199.
- 645 67. Moya-Beltrán A, Cárdenas JP, Covarrubias PC, Issotta F, Ossandon FJ, Grail BM, Holmes  
646 DS, Quatrini R, Johnson DB. 2014. Draft Genome Sequence of the Nominated Type Strain of  
647 “*Ferroplasma myxofaciens*,” an Acidophilic, Iron-Oxidizing Betaproteobacterium. *Genome*  
648 *Announc* 2:e00834-14.
- 649 68. Sun W, Xiao E, Krumins V, Dong Y, Xiao T, Ning Z, Chen H, Xiao Q. 2016.  
650 Characterization of the microbial community composition and the distribution of Fe-  
651 metabolizing bacteria in a creek contaminated by acid mine drainage. *Appl Microbiol Biot*  
652 100:8523–8535.
- 653 69. Senko JM, Wanjugi P, Lucas M, Bruns MA, Burgos WD. 2008. Characterization of Fe(II)  
654 oxidizing bacterial activities and communities at two acidic Appalachian coalmine drainage-  
655 impacted sites. *Isme J* 2:1134.
- 656 70. Méndez-García C, Mesa V, Sprenger RR, Richter M, Diez MS, Solano J, Bargiela R,  
657 Golyshina OV, Manteca Á, Ramos JL, Gallego JR, Llorente I, Santos VAPM dos, Jensen ON,

- 658 Peláez AI, Sánchez J, Ferrer M. 2014. Microbial stratification in low pH oxic and suboxic  
659 macroscopic growths along an acid mine drainage. *Isme J* 8:1259–74.
- 660 71. Pereira LB, Vicentini R, Ottoboni LMM. 2014. Changes in the Bacterial Community of Soil  
661 from a Neutral Mine Drainage Channel. *Plos One* 9:e96605.
- 662 72. Mesa V, Gallego JLR, González-Gil R, Lauga B, Sánchez J, Méndez-García C, Peláez AI.  
663 2017. Bacterial, Archaeal, and Eukaryotic Diversity across Distinct Microhabitats in an Acid  
664 Mine Drainage. *Front Microbiol* 8:1756.
- 665 73. García-Moyano A, Austnes AE, Lanzén A, González-Toril E, Aguilera Á, Øvreås L. 2015.  
666 Novel and Unexpected Microbial Diversity in Acid Mine Drainage in Svalbard (78° N),  
667 Revealed by Culture-Independent Approaches. *Microorg* 3:667–94.
- 668 74. Geissinger O, Herlemann DPR, Mörschel E, Maier UG, Brune A. 2009. The  
669 ultramicrobacterium “*Elusimicrobium minutum*” gen. nov., sp. nov., the first cultivated  
670 representative of the termite group 1 phylum. *Appl Environ Microb* 75:2831–40.
- 671 75. Herlemann DPR, Geissinger O, Ikeda-Ohtsubo W, Kunin V, Sun H, Lapidus A, Hugenholtz  
672 P, Brune A. 2009. Genomic analysis of “*Elusimicrobium minutum*,” the first cultivated  
673 representative of the phylum “*Elusimicrobia*” (formerly termite group 1). *Appl Environ Microb*  
674 75:2841–9.
- 675 76. Zheng H, Dietrich C, Radek R, Brune A. 2015. *Endomicrobium proavitum*, the first isolate  
676 of *Endomicrobia* class. nov. (phylum *Elusimicrobia*) - an ultramicrobacterium with an unusual  
677 cell cycle that fixes nitrogen with a Group IV nitrogenase: *Endomicrobium proavitum* gen. nov.  
678 sp. nov. *Environ Microbiol* 18:191–204.

Table 1. Summary of the MAGs presented here. Taxa indicated by grey text were not analyzed in this work because they were either closely related to cultured taxa (e.g. MAG 7) or were presented previously (MAGs 24 and 24; 33).

| Phylum           | MAG          | Accession    | Taxonomy                                                                                                          | Completeness                                             | Contamination | Strain Heterogeneity | Size (mbp) | Number of Contigs | GC Content | Protein Coding Sequences | Carbon Fixation | Sulfur Cycling | Nitrogen Fixation | Fe(II) Oxidation |   |
|------------------|--------------|--------------|-------------------------------------------------------------------------------------------------------------------|----------------------------------------------------------|---------------|----------------------|------------|-------------------|------------|--------------------------|-----------------|----------------|-------------------|------------------|---|
| Thermoplasmatota | MAG 1        | SAMN14771053 | Archaea; Thermoplasmatota; Thermoplasmata; UBA184; UBA184;                                                        | 84.36                                                    | 1.6           | 0                    | 1.418903   | 217               | 0.67       | 1457                     |                 |                |                   |                  |   |
| Actinobacteria   | MAG 2        | SAMN14771054 | Bacteria; Actinobacteriota; Acidimicrobia; Acidimicrobiales;                                                      | 84.62                                                    | 2.14          | 0                    | 2.526595   | 340               | 0.45       | 2362                     |                 |                |                   |                  |   |
|                  | MAG 3        | SAMN14771055 | Bacteria; Actinobacteriota; Acidimicrobia; Acidimicrobiales; Acidimicrobiaeae;                                    | 90.88                                                    | 0.85          | 0                    | 2.378105   | 192               | 0.52928    | 2137                     | x               |                |                   |                  |   |
|                  | MAG 4        | SAMN14771056 | Bacteria; Actinobacteriota; Acidimicrobia; Acidimicrobiales; Acidimicrobiaeae;                                    | 99.15                                                    | 1.28          | 0                    | 2.817353   | 95                | 0.55046    | 2584                     | x               |                |                   |                  |   |
|                  | MAG 5        | SAMN14771057 | Bacteria; Actinobacteriota; Acidimicrobia; Acidimicrobiales; Acidimicrobiaeae;                                    | 85.13                                                    | 1.36          | 33.33                | 2.138544   | 268               | 0.53278    | 1873                     | x               |                |                   |                  |   |
|                  | MAG 6        | SAMN14771058 | Bacteria; Actinobacteriota; Acidimicrobia; Acidimicrobiales; Acidimicrobiaeae;                                    | 94.02                                                    | 2.14          | 0                    | 2.323875   | 280               | 0.50685    | 2129                     | x               |                |                   |                  |   |
|                  | MAG 7        |              | Bacteria; Actinobacteriota; Acidimicrobia; Acidimicrobiales; Acidimicrobiaeae; Acidithrix; Acidithrix ferroxidans | 70.36                                                    | 2.14          | 33.33                | 2.417212   | 336               | 0.47572    | 2062                     |                 |                | Not analyzed      |                  |   |
|                  | MAG 8        | SAMN14771059 | Bacteria; Actinobacteriota; Acidimicrobia; Acidimicrobiales; RAAP-2; RAAP-2;                                      | 96.3                                                     | 2.99          | 0                    | 2.796923   | 246               | 0.59901    | 2749                     |                 |                |                   |                  |   |
|                  | MAG 9        | SAMN14771060 | Bacteria; Actinobacteriota; Acidimicrobia; Acidimicrobiales; RAAP-2; RAAP-2;                                      | 93.08                                                    | 2.23          | 0                    | 2.2056     | 175               | 0.6155     | 2197                     | x               |                |                   |                  |   |
|                  | MAG 10       | SAMN14771061 | Bacteria; Actinobacteriota; Acidimicrobia; Acidimicrobiales; RAAP-2; RAAP-2;                                      | 94.87                                                    | 2.14          | 0                    | 1.873312   | 163               | 0.63812    | 1856                     |                 |                |                   |                  |   |
|                  | Bacteroidota | MAG 11       | SAMN14771062                                                                                                      | Bacteria; Bacteroidota; Bacteroidia; AKYH767; Palsa-948; | 84.22         | 2                    | 40         | 2.420414          | 335        | 0.46586                  | 2125            |                |                   |                  |   |
| Dornibacterota   | MAG 12       | SAMN14771063 | Bacteria; Dornibacterota; Dornibacteria; UBA8260; Bog-877;                                                        | 95.37                                                    | 0.93          | 0                    | 2.296128   | 226               | 0.68404    | 2207                     |                 |                |                   |                  |   |
| Elusimicrobiota  | MAG 13       | SAMN14771064 | Bacteria; Elusimicrobiota; Elusimicrobia; UBA1565; UBA9628; GWA2-66-18;                                           | 86.06                                                    | 1.5           | 0                    | 3.360875   | 299               | 0.6663     | 3200                     |                 |                | x                 | x                |   |
| Eremiobacterota  | MAG 14       | SAMN14771065 | Bacteria; Eremiobacterota; Eremiobacteria; UBP12; UBA5184;                                                        | 71.43                                                    | 2.78          | 100                  | 1.980657   | 269               | 0.62541    | 1976                     |                 |                |                   |                  |   |
|                  | MAG 15       | SAMN14771066 | Bacteria; Eremiobacterota; Eremiobacteria; UBP12; UBA5184;                                                        | 79.18                                                    | 1.85          | 50                   | 2.083017   | 215               | 0.62452    | 2102                     |                 |                |                   | x                |   |
| Firmicutes       | MAG 16       | SAMN14771067 | Bacteria; Firmicutes K; Alicyclobacillia; Alicyclobacillales; Acidibacillaceae;                                   | 92.65                                                    | 1.57          | 50                   | 2.540112   | 156               | 0.45602    | 2410                     |                 |                |                   |                  |   |
|                  | MAG 17       | SAMN14771068 | Bacteria; Patescibacteria; Patescibacteria; UBA9983 A; UBA2163; C7867-001;                                        | 71.84                                                    | 0             | 0                    | 2.138544   | 268               | 0.53278    | 1873                     |                 |                |                   |                  |   |
| Planctomycetota  | MAG 18       | SAMN14771069 | Bacteria; Planctomycetota; Phycisphaerae;                                                                         | 73.45                                                    | 0             | 0                    | 2.799192   | 419               | 0.56703    | 2424                     |                 |                |                   |                  |   |
|                  | MAG 19       | SAMN14771070 | Bacteria; Planctomycetota; Phycisphaerae; UBA1161;                                                                | 96.32                                                    | 0             | 0                    | 3.578576   | 255               | 0.56229    | 2916                     |                 |                |                   |                  |   |
| Proteobacteria   | MAG 20       | SAMN14771071 | Bacteria; Proteobacteria; Alphaproteobacteria; Acetobacterales; Acetobacteraceae; Acidocella;                     | 92.45                                                    | 2.78          | 57.14                | 2.678786   | 222               | 0.63102    | 2577                     | x               |                | x                 | x                |   |
|                  | MAG 21       | SAMN14771072 | Bacteria; Proteobacteria; Gammaproteobacteria; Burkholderiales;                                                   | 91.83                                                    | 2.01          | 20                   | 2.555995   | 242               | 0.57887    | 2573                     | x               | x              | x                 | x                |   |
|                  | MAG 22       | SAMN14771073 | Bacteria; Proteobacteria; Gammaproteobacteria; Burkholderiales;                                                   | 99.14                                                    | 0             | 0                    | 3.695939   | 108               | 0.64413    | 3442                     | x               | x              |                   | x                |   |
|                  | MAG 23       |              | Bacteria; Proteobacteria; Gammaproteobacteria; Burkholderiales; Ferrovacaceae;                                    | 95.76                                                    | 0.5           | 0                    | 2.374093   | 102               | 0.55802    | 2182                     |                 |                | Not analyzed      |                  |   |
|                  | MAG 24       |              | Bacteria; Proteobacteria; Gammaproteobacteria; Burkholderiales; Ferrovacaceae; Ferrovum;                          | 86.7                                                     | 0.63          | 100                  | 1.845635   | 96                | 0.5385     | 1727                     |                 |                | Not analyzed      |                  |   |
|                  | MAG 25       | SAMN14771074 | Bacteria; Proteobacteria; Gammaproteobacteria; Burkholderiales; Gallionellaceae; Gallionella;                     | 96.67                                                    | 1.43          | 0                    | 2.478987   | 157               | 0.5653     | 2425                     | x               |                |                   |                  | x |
|                  | MAG 26       | SAMN14771075 | Bacteria; Proteobacteria; Gammaproteobacteria; Burkholderiales; Gallionellaceae; Gallionella;                     | 94.44                                                    | 2.41          | 83.33                | 2.296128   | 226               | 0.68404    | 2207                     | x               |                |                   |                  | x |
|                  | MAG 27       | SAMN14771076 | Bacteria; Proteobacteria; Gammaproteobacteria; Pseudomonadales;                                                   | 91.16                                                    | 1.24          | 14.29                | 2.572997   | 319               | 0.51007    | 2364                     |                 |                | x                 |                  | x |
|                  | MAG 28       | SAMN14771077 | Bacteria; Proteobacteria; Gammaproteobacteria; Steroidobacterales; Steroidobacteraceae;                           | 85.78                                                    | 2.5           | 18.18                | 2.564032   | 320               | 0.65702    | 2382                     | x               |                |                   |                  | x |
|                  | MAG 29       | SAMN14771078 | Bacteria; Proteobacteria; Gammaproteobacteria; UBA1113; UBA1113;                                                  | 93.6                                                     | 1.36          | 33.33                | 2.699483   | 337               | 0.39968    | 2364                     |                 |                |                   |                  |   |
| Spirochaetota    | MAG 30       | SAMN14771079 | Bacteria; Spirochaetota; Spirochaeta; Spirochaetales;                                                             | 95.4                                                     | 0.4           | 0                    | 2.61822    | 142               | 0.50392    | 2361                     |                 |                |                   |                  |   |
|                  | MAG 31       | SAMN14771080 | Bacteria; Spirochaetota; Spirochaeta; Spirochaetales;                                                             | 77.93                                                    | 1.6           | 50                   | 1.946496   | 327               | 0.53893    | 1830                     |                 |                |                   |                  |   |
| Verucomicrobiota | MAG 32       | SAMN14771081 | Bacteria; Verucomicrobiota A; Chlamydia; Parachlamydiales; Ga0074140;                                             | 87.1                                                     | 1.35          | 50                   | 1.881114   | 247               | 0.39274    | 1615                     |                 |                |                   |                  |   |
